# Supplementary material for: The common HAQ STING variant impairs cGAS-dependent antibacterial responses and is associated with susceptibility to Legionnaires’ disease in humans
Source: PubMed Central journal article supplement (PMC5770077; doi:10.1371/journal.ppat.1006829), 2018-01-03

S2 Fig.

BMDM

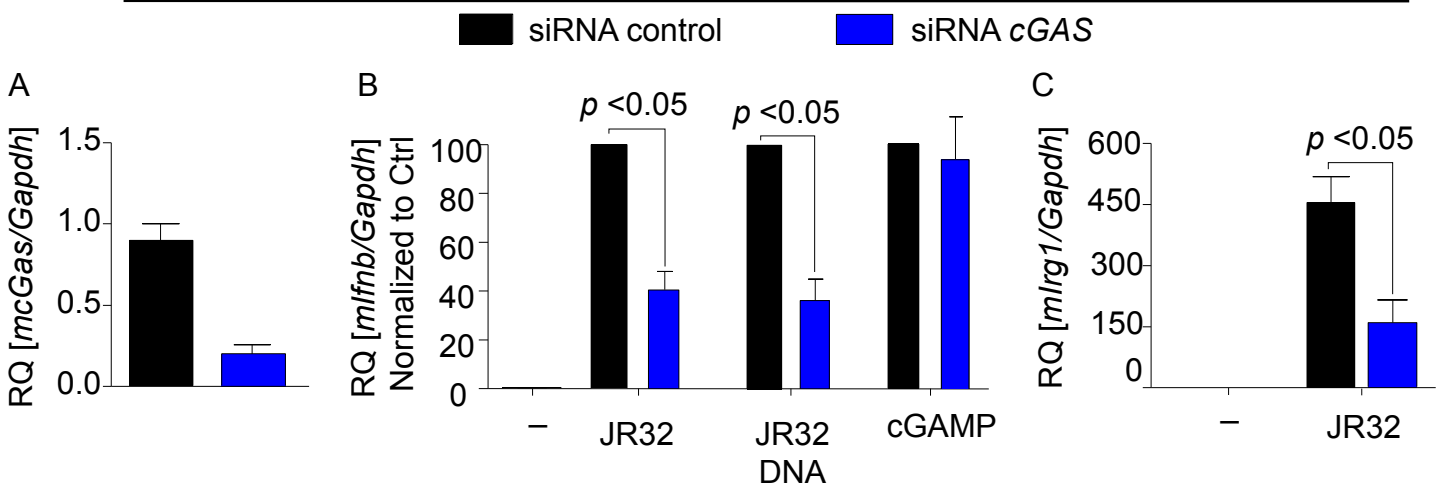

Supplement: ppat.1006829.s002.pdf [file ppat.1006829.s002.pdf]
