# Supplementary material for: The common HAQ STING variant impairs cGAS-dependent antibacterial responses and is associated with susceptibility to Legionnaires’ disease in humans
Source: PubMed Central journal article supplement (PMC5770077; doi:10.1371/journal.ppat.1006829), 2018-01-03

## Human PBMC

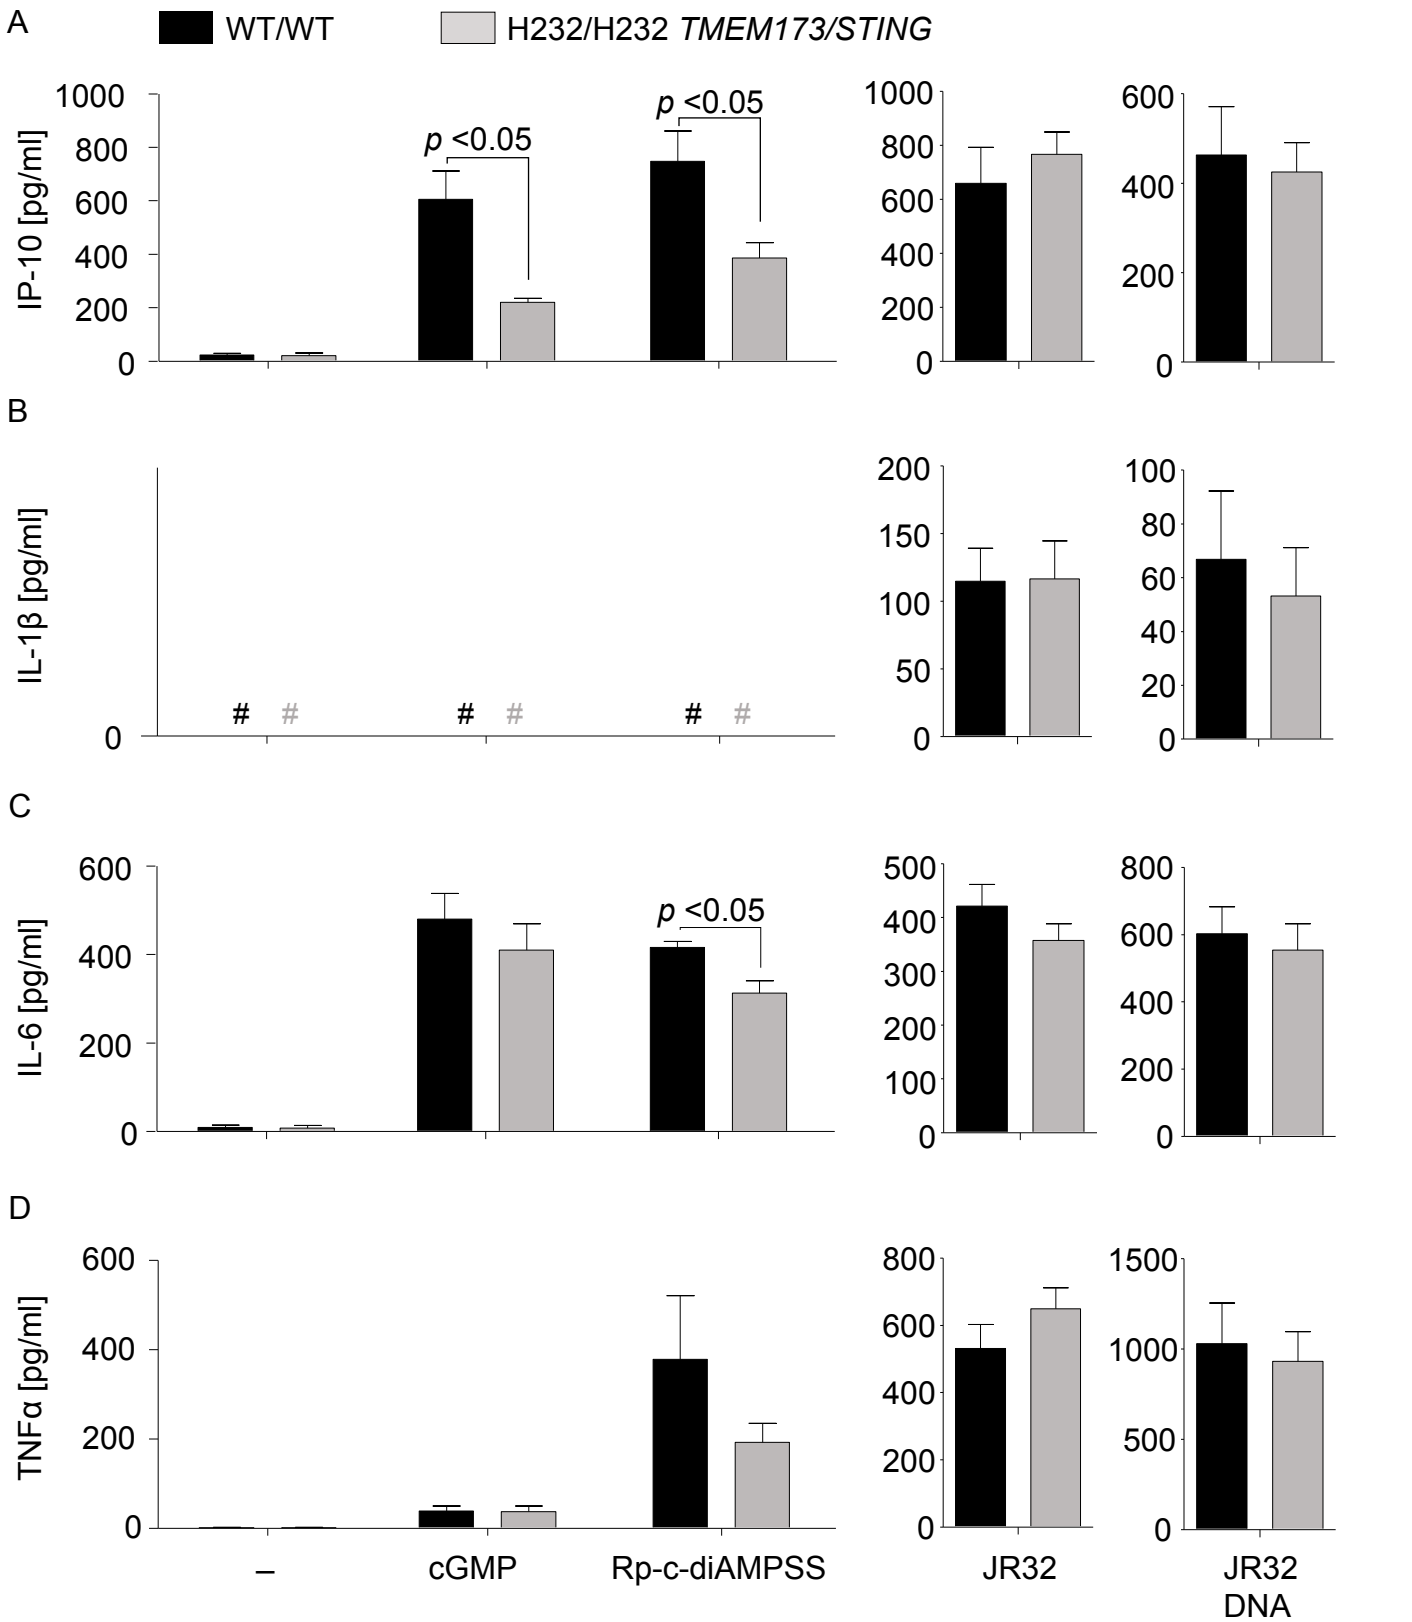

Supplement: ppat.1006829.s008.pdf [file ppat.1006829.s008.pdf]
